## Diet, Inactivity & CVD Risk Factors in Older Sierra Leoneans (Preprint)

### 1 **The association of diet and physical inactivity with obesity, diabetes, and hypertension** 2 **among older adults living in Sierra Leone.**

3 Tahir Bockarie<sup>1\*</sup>, Ankit Shanker<sup>2</sup>, Mohamed B. Jalloh<sup>3</sup>, Alhaji M. Kamara<sup>4</sup>, Maria Lisa  
4 Odland<sup>5</sup>, Haja Wurie<sup>6</sup>, Rashid Ansumana<sup>7</sup>, Joseph Lamin<sup>7,8</sup>, Miles Witham<sup>9,10</sup>, Oyinlola  
5 Oyeboode<sup>11</sup>, Justine Davies<sup>5,12,13</sup>

6 <sup>1</sup>Faculty of Life Sciences & Medicine, School of Life Course & Population Sciences,  
7 Department of Women & Children's Health, King's College London, London WC2R 2LS, UK

8 <sup>2</sup>Warwick Medical School, University of Warwick, Coventry, UK

9 <sup>3</sup>Department of Medicine, McMaster University, 20 Copeland Avenue, Suite C3-117,  
10 Hamilton, ON L8L 0A3, Canada

11 <sup>4</sup>Institute of Global Health, Heidelberg University, Im Neuenheimer Feld 365, Heidelberg,  
12 Germany, 69120

13 <sup>5</sup>Institute of Applied Health Research, College of Medical and Dental Sciences, University of  
14 Birmingham, Birmingham B15 2TT, UK

15 <sup>6</sup>College of Medicine and Allied Health Sciences, University of Sierra Leone, Freetown,  
16 Western Area, Sierra Leone

17 <sup>7</sup>School of Community Health Sciences, Njala University, Bo Campus, Bo, Sierra Leone

18 <sup>8</sup>Mercy Hospital Research Laboratory, Bo, Sierra Leone

19 <sup>9</sup>AGE Research Group, NIHR Newcastle Biomedical Research Centre, Newcastle University,  
20 Newcastle upon Tyne, UK

21 <sup>10</sup>Newcastle upon Tyne Hospitals Trust, Newcastle upon Tyne, UK

22 <sup>11</sup>Centre for Public Health and Policy, Wolfson Institute of Population Health, Queen Mary  
23 University of London, London, UK

24 <sup>12</sup>MRC/Wits Rural Public Health & Health Transitions Research Unit (Agincourt), University  
25 of the Witwatersrand, Johannesburg, South Africa

26 <sup>13</sup>Department for Global Health, Centre for Global Surgery, Stellenbosch University,  
27 Stellenbosch, South Africa

28 \*Corresponding author:

29 Tahir Bockarie Email: [tahir.1.bockarie@kcl.ac.uk](mailto:tahir.1.bockarie@kcl.ac.uk)

30

31 Word count: [5512 (Including Tables)]

NOTE: This preprint reports new research that has not been certified by peer review and should not be used to guide clinical practice.

## Diet, Inactivity & CVD Risk Factors in Older Sierra Leoneans (Preprint)

32 Words Number of references: [1345]

33 **This preprint has not undergone peer review. It reports new research that has yet to be**  
34 **evaluated and so should not be used to guide clinical practice.**

35 Conflicts of Interest: [The authors declare no conflicts of interest]

36

## Diet, Inactivity & CVD Risk Factors in Older Sierra Leoneans (Preprint)

### 37 **Abstract**

### 38 **Introduction:**

39 Cardiovascular diseases (CVDs) are primarily driven by modifiable behavioural risk factors  
40 and are the leading cause of death globally. In low- and middle-income countries (LMICs),  
41 rapid urbanization and changes in behaviour are exacerbating the burden of CVDs but there is  
42 limited research into specific associations with CVDs in older adults in low-income countries,  
43 such as Sierra Leone. This study examines the association between behavioural risk factors and  
44 their physiological sequelae among adults aged 40 and above in Bo District, Sierra Leone.

### 45 **Methods:**

46 A cross-sectional study design was used to collect data from 1,978 randomly sampled adults  
47 through a household survey. Survey questions were based on the validated WHO STEPs  
48 questionnaire. Multivariable logistic regression analysis was performed to determine the  
49 associations between behavioural risk factors (such as diet, physical activity, and salt intake)  
50 and the presence of hypertension, diabetes, and obesity, adjusting for socio-demographic  
51 variables.

### 52 **Results:**

53 At least one physiological risk-factor for CVD was present in 43.5% of participants.  
54 Hypertension was associated with urban living (OR=1.46, 95% CI [1.41-1.51]), older age (OR  
55 for 80+=3.98, 95% CI [3.70-4.28]), insufficient fruit and vegetable intake (OR=1.52, 95% CI  
56 [1.46-1.60]), and low physical activity (OR=1.35, 95% CI [1.27-1.43]). Diabetes was  
57 associated with urban residence (OR=1.84, 95% CI [1.66-2.05]), older age (OR for 70-79  
58 =3.82, 95% CI [3.28-4.45]), low fruit and vegetable consumption (OR=1.61, 95% CI [1.36-  
59 1.90]), high salt intake (OR=1.34, 95% CI [1.21-1.49]), and low physical activity (OR=1.47,  
60 95% CI [1.26-1.71]). Obesity was less likely among males (OR=0.37, 95% CI [0.36-0.38]) and  
61 those aged 80+ (OR=0.39, 95% CI [0.35-0.43]).

## Diet, Inactivity & CVD Risk Factors in Older Sierra Leoneans (Preprint)

62

### 63 **Conclusion:**

64 This study highlights the need for evidence for targeted public health interventions in Bo  
65 District, Sierra Leone. Promoting healthier lifestyles to reduce poor diet, and physical  
66 inactivity, particularly in urban areas, could decrease CVD prevalence.

67

68 **Keywords: Cardiovascular diseases, Diet, Physical inactivity, Sierra Leone, Public health**  
69 **interventions**

## Diet, Inactivity & CVD Risk Factors in Older Sierra Leoneans (Preprint)

70

### Summary

What is already known on this topic:

- Cardiovascular diseases (CVDs) are the leading cause of global mortality, with a disproportionate burden in low- and middle-income countries.
- Modifiable risk factors, including diet and physical inactivity, significantly contribute to CVD prevalence.
- Limited research exists on the specific associations between these risk factors and CVDs in older adults in Sierra Leone.

What this study adds:

- This study provides evidence of significant associations between dietary habits, salt intake, physical activity levels, and physiological risk factors for CVD: hypertension, diabetes, and obesity among adults aged 40 and above in Bo District, Sierra Leone.
- It quantifies the increased odds of physiological CVD risk factors associated with inadequate fruit and vegetable intake, high salt consumption, and physical inactivity in this population.
- The study illuminates the links between behavioural and physiological risk factors in the context of rapid urbanisation in Sierra Leone.

How this study might affect research, practice or policy:

- These findings will directly inform the development of targeted public health interventions in Sierra Leone, prioritizing the promotion of fruit and vegetable consumption and increased physical activity among adults.
- The study results will drive policy changes to address urbanisation-related lifestyle factors, including initiatives to improve access to healthy foods and create environments conducive to physical activity.
- This research establishes a foundation for future studies on CVD risk factors in Sierra Leone, particularly focusing on age- and gender-specific interventions

## Diet, Inactivity & CVD Risk Factors in Older Sierra Leoneans (Preprint)

### 71 **Introduction**

72 Non-communicable diseases (NCDs), including cardiovascular disease (CVD) are the  
73 leading causes of mortality worldwide, accounting for 78% of global deaths, constituting a  
74 significant public health challenge <sup>1-4</sup> . In 2019, CVDs alone were responsible for 17.9 million  
75 deaths globally, underscoring their significant public health relevance <sup>5 6</sup> . Low- and middle-  
76 income countries (LMICs) face a dual burden of infectious and NCDs, straining healthcare  
77 systems and hindering economic development <sup>11</sup> . Research has highlighted that both LMICs  
78 and the vulnerable communities of high-income countries (HIC) share a disproportionate  
79 burden of CVDs <sup>6</sup> . Furthermore, the high prevalence of these risk factors poses a substantial  
80 obstacle to achieving Sustainable Development Goal 3, which aims to ensure healthy lives and  
81 promote well-being for all at all ages by 2030 <sup>3 11</sup> .

82 Drivers of CVDs are largely behavioural, including dietary behaviour, alcohol  
83 consumption leading to physiological risk factors, including hypertension, diabetes and obesity  
84 <sup>4 7 8 9</sup>. Understanding the interplay between these behavioural and physiological risk factors in  
85 different populations is crucial for developing effective public health strategies aimed at  
86 mitigating the prevalence of CVDs.

87

88 Although there is growing understanding of behavioural risk factors for CVDs in many  
89 LMICs, there is less knowledge about these factors in some of the most deprived countries in  
90 sub-Saharan Africa (SSA). This gap is concerning, especially given the rising prevalence of  
91 CVDs in these regions amid rapid demographic shifts. Urbanization often leads to lifestyle  
92 changes including increased consumption of processed foods and reduced physical activity due  
93 to greater reliance on motorized transportation <sup>12-16</sup> . Studies indicate that urban dwellers in  
94 LMICs exhibit dietary patterns characterized by insufficient intake of fruits and vegetables,  
95 high consumption of sugar and salt, and increased intake of vegetable oil, meat, and processed

## Diet, Inactivity & CVD Risk Factors in Older Sierra Leoneans (Preprint)

96 foods<sup>9 10 17-21</sup> [10, 11, 20-23]. Systematic reviews have highlighted that salt intake in sub-  
97 Saharan Africa is alarmingly high, often exceeding recommended levels due to the  
98 consumption of processed foods and added salt. Unhealthy diets, characterized by high  
99 consumption of processed foods, sugars, and salt, and low intake of fruits and vegetables, are  
100 closely linked to the development of hypertension and obesity<sup>9 10</sup>. Furthermore, research on  
101 dietary consumption patterns in sub-Saharan Africa reveals a complex interaction between  
102 meat, fruit, and vegetable intake. While meat consumption has increased, often driven by  
103 urbanization and higher income levels, fruit and vegetable intake remain critically low. This  
104 imbalance in dietary patterns is linked to rising non-communicable diseases and underscores  
105 the need for targeted nutritional interventions<sup>22</sup>.

106 Although previous studies have explored the association between behavioural and  
107 physiological risk factors for CVDs, contemporary evidence from local populations is  
108 necessary to drive action by policymakers. Notably, in many low-income countries,  
109 comprehensive studies are lacking that investigate the physiological risk factors for CVDs in  
110 adults and their association with dietary and physical activity risk factors. Sierra Leone is one  
111 such country where insight into the association between behavioural and physiological risk  
112 factors of CVDs in Sierra Leone is needed, given the country's rapid epidemiological  
113 transition<sup>23-26</sup>.

114 . This study aims to examine the association between behavioural and physiological  
115 risk factors for CVDs among adults aged 40 years and older in Bo District, Sierra Leone. By  
116 elucidating these relationships, we seek to provide evidence-based insights to inform targeted  
117 interventions, thereby reducing the burden of CVDs in Sierra Leone and similar settings. This  
118 research is crucial for informing policy and practice, ultimately contributing to improved health  
119 outcomes and the attainment of global health targets.

120

## Diet, Inactivity & CVD Risk Factors in Older Sierra Leoneans (Preprint)

### 121 **Methods**

#### 122 **Study setting**

123 This study was conducted in Bo District, located in the Southern Province of Sierra  
124 Leone. Incorporating the country's second-largest city, Bo District encompasses well-defined  
125 rural and urban areas and is like other districts in Sierra Leone, apart from the Western Area,  
126 which is predominantly urban. According to the 2015 census, Bo District had a population of  
127 575,478, with 380,307 (66.1%) residing in rural areas and 195,171 (33.9%) living in urban  
128 areas, primarily in Bo City. Notably, only 17.4% (100,188) of the population were over 40  
129 years of age <sup>27</sup>.

#### 130 **Sampling strategy**

131 A cross-sectional household survey was conducted from September to December 2018.  
132 The primary objective was to collect data on CVD risk factors, with a specific focus on diabetes  
133 prevalence, which was anticipated to be the lowest among the CVD risk factors. Initially, target  
134 sample size was 1,893 participants, calculated to detect a diabetes prevalence of 4% with  $\pm 1\%$   
135 precision. To account for potential non-response and missing data, an oversampling rate of  
136 10% was applied, bringing the total target to approximately 2,082 participants. During data  
137 collection, we successfully recruited 2,071 individuals.

138 Participants in this study were individuals aged 40 years and older, selected from both  
139 rural and urban areas. The sampling proportions were aligned with the habitation patterns  
140 documented in the 2015 population and housing census for Bo District. This alignment ensured  
141 that the sample was representative of the population distribution in terms of age and urban-  
142 rural residency. Exclusion criteria included confirmed pregnancy and diagnosis with a terminal  
143 or incapacitating illness, which could have potentially influenced the study's outcomes and  
144 participant availability.



## Diet, Inactivity & CVD Risk Factors in Older Sierra Leoneans (Preprint)

145 To accurately reflect the urban-rural population ratio, the study aimed to include 700  
146 urban and 1,300 rural participants. We purposively sampled the only two urban chiefdoms (Bo  
147 City and Tikonko). Out of the 24 eligible urban communities within Bo City and Tikonko,  
148 seven were selected from a randomly ordered list, with 100 participants recruited in each. For  
149 the rural sample, Seven out of the 14 rural chiefdoms were randomly selected using a random  
150 ordering method. We aimed to recruit 93 participants from each selected settlement or village.  
151 If the target number was not achieved in the initial community, additional communities were  
152 selected from the randomly ordered list until the quota was reached.

153 Data collection in each community followed a systematic approach, ensuring  
154 comprehensive coverage and accuracy. Data collectors began at randomly chosen points within  
155 each community and sampled every second household along roads or tracks. Each household  
156 was permitted to enrol a maximum of two eligible individuals aged. In smaller communities  
157 with fewer than 93 eligible individuals, all individuals over 40 years were included in the study.  
158 If a selected participant declined to participate, another individual within the household or  
159 community was chosen. In cases where no one was home, a message was left with neighbours,  
160 and the researchers returned the following day to complete the sampling.

161 The study's geographical scope was limited to a 40 km radius from the centre of Bo,  
162 ensuring accessibility for researchers and efficient data collection. All chiefdoms and  
163 subdistricts in Bo District fell within this radius, allowing for a comprehensive and  
164 representative sample of the district's population.

### 165 **Data collection**

166 Data were collected electronically using ODK® (Open Data Kit) software on tablet  
167 devices by a team of 15 trained data collectors. The survey was based on the World Health  
168 Organization's STEPwise approach to chronic disease risk factor surveillance (WHO-STEPS).

## Diet, Inactivity & CVD Risk Factors in Older Sierra Leoneans (Preprint)

169 WHO-STEPS methodology provides a standardized framework for collecting, analysing, and  
170 disseminating data on non-communicable diseases (NCDs) and their associated risk factors.

171 The household survey incorporated all three steps of the WHO-STEPS approach:

172 1. **Step 1: Questionnaire** - A comprehensive questionnaire was administered, covering  
173 sociodemographic characteristics, behavioural and dietary habits, and medical history  
174 related to hypertension and diabetes. The demographic section included questions on  
175 age, sex, marital status, and education, while behavioural queries addressed fruit and  
176 vegetable intake, physical activity levels, salt intake, and smoking habits. The medical  
177 history component inquired about past incidences of stroke, heart attack, or angina, as  
178 well as previous treatments for raised blood pressure and cholesterol levels.  
179 Additionally, the questionnaire included 49 items related to household assets,  
180 construction materials, and awareness of CVD risk factors and treatments.

181 2. **Step 2: Physical Measurements** - Physical measurements were conducted to obtain  
182 anthropometric data and blood pressure readings. Height was measured with a  
183 measuring stick with participants standing without shoes, backs, hips, and heels against  
184 a wall, and looking ahead horizontally. This method was validated using the SECA 213  
185 stadiometer during training and bi-weekly checks. Body weight was recorded using an  
186 Omron medical scale, calibrated daily. Body Mass Index (BMI) was calculated as  
187 weight in kilograms divided by the square of the height in meters ( $\text{kg}/\text{m}^2$ ). Blood  
188 pressure was measured using an Omron M6 AC LED blood pressure monitor, with  
189 three readings taken five minutes apart; the average of the last two readings was  
190 recorded. Participants were seated and rested during these measurements.

191 3. **Step 3: Biochemical Measurements** - Blood samples were obtained in the morning  
192 after an 8-hour overnight fast. The Accutrend Plus® point-of-care device (Roche  
193 Diagnostics) was utilized to measure fasting capillary glucose concentrations; results

## Diet, Inactivity & CVD Risk Factors in Older Sierra Leoneans (Preprint)

194            were converted to plasma glucose levels using a conversion factor of 1.11. Participants'  
195            fasting status was verified prior to blood sampling, and those who had not fasted were  
196            labelled accordingly.

197

## Diet, Inactivity & CVD Risk Factors in Older Sierra Leoneans (Preprint)

### 198 **Demographic Information**

199           Demographic information included geographic area, sex, and age. Geographic area  
200 was categorized as either rural or urban, Sex was classified as female or male. Age was  
201 recorded both as a continuous variable and presented as a categorical variable, divided into five  
202 groups: 40-49 years, 50-59 years, 60-69 years, 70-79 years, and 80+ years.

### 203 **Outcome Measures**

204           The study focused on three primary outcome measures: overweight or obesity,  
205 hypertension, and diabetes. Overweight or obesity was defined as having a BMI of  $\geq 25$  kg/m<sup>2</sup>,  
206 while a BMI  $< 25$  kg/m<sup>2</sup> was used as the reference category. Hypertension was defined by a  
207 systolic blood pressure (SBP) of  $\geq 140$  mmHg or a diastolic blood pressure (DBP) of  $\geq 90$   
208 mmHg, or current use of blood pressure-lowering medication. Diabetes was identified by a  
209 fasting plasma glucose level of  $\geq 7.0$  mmol/L, a random plasma glucose level of  $\geq 11.1$  mmol/l,  
210 or the use of antidiabetic medications.

211

### 212 **Behavioural risk-factors**

213           Behavioural risk-factors included dietary habits, specifically fruit, vegetable and salt  
214 intake, and physical activity levels. Consumption of fruits and vegetables were reported as  
215 servings using show cards provided by data collectors. Low consumption was defined as fewer  
216 than five servings daily ( $< 5$ FV), aligning with global dietary recommendations for fruit and  
217 vegetable intake. For salt intake, participants, could select from four responses: (1) added salt  
218 at the table, (2) added salt during cooking, (3) consumed salty snacks, or (4) did not use salt  
219 from any of these sources. Responses were categorised into three groups: those who consumed  
220 salt from only one source (either table salt, cooking salt, or salty snacks), those who consumed  
221 salt from two or more sources, and those who did not use salt from any of the specified sources.

## Diet, Inactivity & CVD Risk Factors in Older Sierra Leoneans (Preprint)

222 Physical activity levels were assessed based on self-reported hours of activity per week,  
223 in accordance with previous studies<sup>21</sup>. Total hours and minutes of activity across work, travel,  
224 and leisure domains were aggregated into two categories: less than 150 minutes per week  
225 (inadequate moderate and vigorous physical activity (MVPA)) and 150 minutes or more per  
226 week (adequate MVPA). Physical inactivity was assessed by asking participants “Excluding  
227 sleeping, how much time do you usually spend sitting or reclining on a typical day?” The total  
228 daily hours were then categorised into two groups: less than 3 hours and 3 or more hours. A  
229 composite variable was created to capture overall physical activity risk. Participants were  
230 categorized into three groups: no risk factors (adequate MVPA and less than 3 hours of daily  
231 inactivity), one risk factor (either inadequate MVPA or 3 or more hours of daily inactivity),  
232 and two risk factors (both inadequate MVPA and 3 or more hours of daily inactivity).

233 To evaluate the combined impact of multiple behavioural risk factors, we created a  
234 compound variable ranging from 0 to 6, reflecting the number of risk factors each individual  
235 exhibited, with risk-factors aligned to the definitions above. The behavioural risk factors  
236 considered were: (1) insufficient fruit and vegetable consumption (0 or 1); (2) salt intake from  
237 (0 (no sources), 1 (just one source), 2 (for consumption of salt from two or three sources, where  
238 the sources are table salt, cooking salt and salty snacks)), (3) low physical activity (0 for  
239 adequate MVPA and less than 3 hours of daily inactivity, 1 for either inadequate MVPA or 3  
240 or more hours of daily inactivity, and 2 for having both physical activity risk factors (both  
241 inadequate MVPA and 3 or more hours of daily inactivity). Participants were assigned scores  
242 based on the cumulative presence of these risk factors. A score of 0 was assigned to individuals  
243 with no risk factors, while a score of 6 was assigned to those exhibiting all six risk factors.

### 244 **Ethical Considerations**

245 The study protocol was reviewed and approved by the Sierra Leone Ethics and Scientific  
246 Review Committee (SLESRC) at the Ministry of Health and Sanitation (MoHS) and King’s

## Diet, Inactivity & CVD Risk Factors in Older Sierra Leoneans (Preprint)

247 College London (reference: HR-17/18–7298). Consent to conduct the study in each area was  
248 sought from chiefs in each subdistrict or village prior to data collection. Written informed  
249 consent was obtained from all participants, with literate witnesses assisting in cases of  
250 illiteracy. Where signatures were not possible, thumbprints were used. Data used in the analysis  
251 was anonymized to protect participants' privacy

### 252 **Statistical Analysis**

253 Statistical analyses were performed using the Statistical Package for Social Sciences  
254 (SPSS) version 27 (IBM Corp., Armonk, NY, USA). Participants with missing data on lifestyle  
255 factors, outcome measures, or covariates were excluded from the analysis. Descriptive  
256 statistics, including frequencies (proportions) and means with standard deviations (SD), were  
257 used to summarize the data. The data were weighted using probability weights based on age  
258 and sex distributions from the 2015 Population and Housing Census for Bo District. A p-value  
259 of  $\leq 0.05$  was considered statistically significant.

260 Multivariable adjusted binary logistic regression models were used to analyse the  
261 associations between lifestyle factors and clinical outcomes (hypertension, diabetes, and  
262 obesity). The models incorporated all behavioural and socio-demographic covariates  
263 simultaneously, without using stepwise selection. This approach ensured a comprehensive  
264 evaluation of the relationships between behaviours and health outcomes.

265

### 266 **Results**

#### 267 **Summary of population characteristics, cardiovascular conditions, and risk factors**

268 After excluding 93 cases due to missing values, the final sample consisted of 1,978 individuals.  
269 The sociodemographic characteristics of the unweighted and weighted study populations are  
270 presented in Table 1.

## Diet, Inactivity & CVD Risk Factors in Older Sierra Leoneans (Preprint)

271  
272

Table 1: Socio-demographic characteristics of study population

| Household Survey Participants |                     |                   |
|-------------------------------|---------------------|-------------------|
|                               | Unweighted<br>n (%) | Weighted<br>n (%) |
| Location                      |                     |                   |
| Rural                         | 1205 (60.9)         | 60739 (62.6)      |
| Urban                         | 773 (39.1)          | 36217 (37.4)      |
| Sex                           |                     |                   |
| Female                        | 1100 (55.6)         | 47766 (49.3)      |
| Male                          | 878 (44.4)          | 49190 (50.7)      |
| Age Group                     |                     |                   |
| 40-49                         | 682 (34.5)          | 43116 (44.5)      |
| 50-59                         | 546 (27.6)          | 24379 (25.1)      |
| 60-69                         | 340 (17.2)          | 14381 (14.8)      |
| 70-79                         | 251 (12.7)          | 8913 (9.2)        |
| 80+                           | 159 (8.0)           | 6166 (6.4)        |
| Education                     |                     |                   |
| Some Education                | 615 (31.1)          | 31731 (32.7)      |
| No Education                  | 1363 (68.9)         | 65225 (67.3)      |
| Marital Status                |                     |                   |
| Married or Cohabiting         | 1355 (68.5)         | 70364 (72.6)      |
| Not Married                   | 623 (31.5)          | 26591 (27.4)      |
| Wealth Quintile               |                     |                   |
| Poorest                       | 395 (20.0)          | 19896 (20.5)      |
| Poorer                        | 397 (20.1)          | 19964 (20.6)      |
| Middle                        | 397 (20.1)          | 19493 (20.1)      |
| Richer                        | 394 (19.9)          | 19093 (19.7)      |
| Richest                       | 395 (20.0)          | 18510 (19.1)      |

273

274 Among the unweighted study participants, there were 878 men (44.4%) and 1,100 women  
275 (55.6%). The majority of participants were between 40-49 years old (34.5%), had no formal  
276 education (68.9%), and were married or cohabiting (68.5%). The weighted study population  
277 characteristics were similar to those of the unweighted population.

278  
279

## Diet, Inactivity & CVD Risk Factors in Older Sierra Leoneans (Preprint)

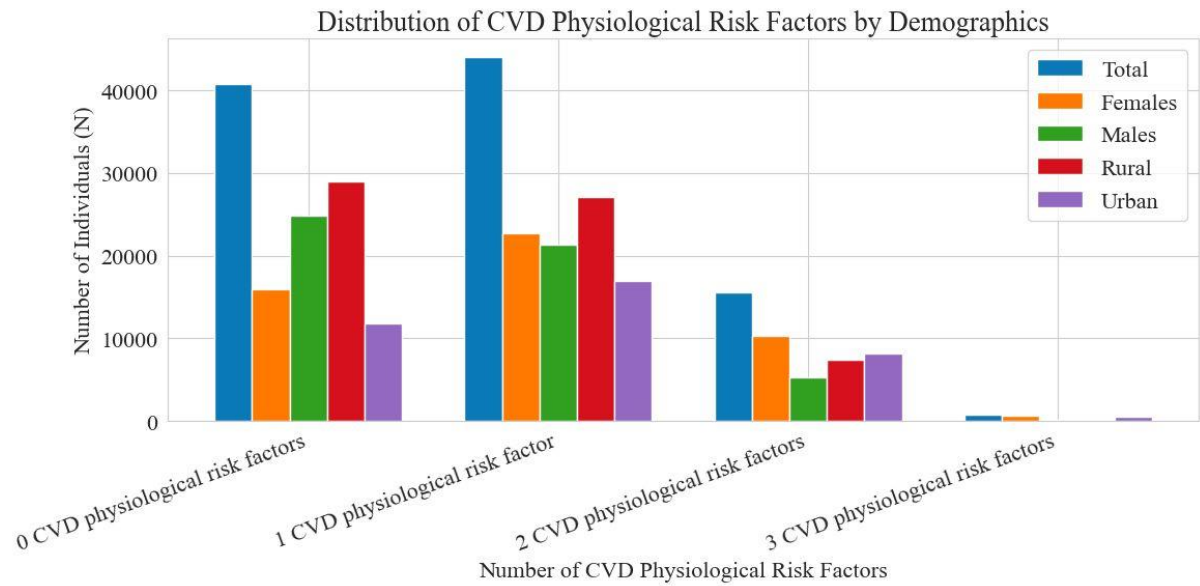

Note: Figure shows total weighted sample size for each CVD physiological risk factor (hypertension, diabetes, obesity) and further distribution by gender and location

280

281

282 Out of the 1,978 participants, 43.5% had at least one physiological risk factor for CVD, as

283 shown in Table 2. A higher proportion of females (45.9%) compared with males (41.3%)

284 reported having at least one of these conditions. Additionally, fewer rural dwellers (42.6%) had

285 at least one condition compared with urban dwellers (45.0%).

286

287

Table 2 Summary of number of co-occurring physiological risk factor by sex and by location

| Multiple physiological risk factors | Total N (%)  | Females N(%) | Males N(%)   | Rural N(%)   | Urban N(%)   |
|-------------------------------------|--------------|--------------|--------------|--------------|--------------|
| 0 CVD physiological risk factors    | 40820 (40.3) | 15960 (32.2) | 24860 (48.2) | 28963 (45.5) | 11858 (31.6) |
| 1 CVD physiological risk factor     | 44060 (43.5) | 22764 (45.9) | 21296 (41.3) | 27171 (42.6) | 16889 (45.0) |
| 2 CVD physiological risk factors    | 15598 (15.4) | 10310 (20.8) | 5288 (10.2)  | 7377 (11.6)  | 8221 (21.9)  |
| 3 CVD physiological risk factors    | 747 (0.7)    | 588 (1.2)    | 159 (0.3)    | 198 (0.3)    | 549 (1.5)    |

288

289

290

Note: Table shows total weighted sample size for each CVD physiological risk factors (hypertension, diabetes, obesity) and further distribution by gender and location

291 Table 3 shows an increase in the odds of CVD physiological risk factors (Hypertension and

292 Obesity) with an increasing number of behavioural factors; individuals with six behavioural

293 risk factors had a significantly greater risk of hypertension (OR=2.15, 95% CI [1.88-2.44],



## Diet, Inactivity & CVD Risk Factors in Older Sierra Leoneans (Preprint)

294 p<0.001) and overweight/obesity (OR=2.41, 95% CI [2.09-2.78], p<0.001) compared with  
295 those in the reference category. For hypertension and obesity, there is a clear dose-response  
296 relationship.

297  
298  
299

Table 3 Association between multiple behavioural risk factors and physiological risk factors

| Number of Risk Factors   | Hypertension OR (95% CI) | Obesity OR (95% CI) |
|--------------------------|--------------------------|---------------------|
| 0-1 (Reference Category) | Referent                 | Referent            |
| 2                        | 1.01 (0.96-1.05)         | 1.61*** (1.52-1.70) |
| 3                        | 1.17*** (1.12-1.22)      | 1.70*** (1.61-1.80) |
| 4                        | 1.40*** (1.33-1.47)      | 2.05*** (1.93-2.17) |
| 5                        | 1.81*** (1.69-1.94)      | 2.40*** (2.21-2.60) |
| 6                        | 2.15*** (1.88-2.44)      | 2.41*** (2.09-2.78) |

300  
301  
302  
303  
304  
305  
306  
307  
308  
309

**Note:** Significance levels are denoted by stars: \*\*\* for  $p \leq 0.01$ , \*\* for  $0.01 < p \leq 0.05$ , and \* for  $0.05 < p \leq 0.10$ .

Risk factors include insufficient fruit and vegetable consumption (<5 servings/day), inadequate salt intake (from one source), high salt intake (from 2-3 sources), low physical activity (<3 hours/day), one physical activity risk factor, and two physical activity risk factors.

310 In the multivariable logistic regression models individuals living in urban areas (OR=1.46, 95%  
311 CI [1.41-1.51], p<0.001), increasing age (OR for 80+ =3.98, 95% CI [3.70-4.28], p<0.001),  
312 consuming fewer than five servings of fruits and vegetables daily (OR=1.52, 95% CI [1.46-  
313 1.60], p<0.001), and having two physical activity risk factors (OR=1.35, 95% CI [1.27-1.43],  
314 p<0.001) had significantly higher odds of hypertension (Table 4).

315 Higher odds of diabetes were observed among individuals living in urban areas (OR=1.84, 95%  
316 CI [1.66-2.05], p<0.001), increasing age (OR for 70-79 years =3.82, 95% CI [3.28-4.45],  
317 p<0.001), consuming fewer than five servings of fruits and vegetables daily (OR=1.61, 95%  
318 CI [1.36-1.90], p<0.001), consuming salt from two or three sources (OR=1.34, 95% CI [1.21-

## Diet, Inactivity & CVD Risk Factors in Older Sierra Leoneans (Preprint)

319 1.49],  $p < 0.001$ ), and having two physical activity risk factors (OR=1.47, 95% CI [1.26-1.71],  
320  $p < 0.001$ ).

321 Urban residents showed higher odds of overweight/obesity (OR=1.66, 95% CI [1.59-1.72],  
322  $p < 0.001$ ), as did those consuming salt from two or three sources (OR=1.21, 95% CI [1.17-  
323 1.25],  $p < 0.001$ ) and those with two physical activity risk factors (OR=1.30, 95% CI [1.22-  
324 1.39],  $p < 0.001$ ). Conversely, male individuals (OR=0.37, 95% CI [0.36-0.38],  $p < 0.001$ ) and  
325 older age groups (70-79 years: OR=0.55, 95% CI [0.51-0.59],  $p < 0.001$ ; 80+ years: OR=0.39,  
326 95% CI [0.35-0.43],  $p < 0.001$ ) had significantly lower odds of overweight/obesity.

## Diet, Inactivity & CVD Risk Factors in Older Sierra Leoneans (Preprint)

327  
328  
329

Table 4 Adjusted logistic regression model between multiple behavioural risk factors and CVD Physiological Risk Factors

|                                       | Hypertension<br>OR (95% CI) | Diabetes<br>OR (95% CI) | Overweight/Obesity<br>OR (95% CI) |
|---------------------------------------|-----------------------------|-------------------------|-----------------------------------|
| <b>Location</b>                       |                             |                         |                                   |
| Rural                                 | Referent                    | Referent                | Referent                          |
| Urban                                 | 1.46 *** (1.41-1.51)        | 1.84 *** (1.66-2.05)    | 1.66 ***(1.59-1.72)               |
| <b>Sex</b>                            |                             |                         |                                   |
| Female                                | Referent                    | Referent                | Referent                          |
| Male                                  | 0.84 *** (0.81-0.87)        | 0.90 (0.81-1.01)        | 0.37 ***(0.36-0.38)               |
| <b>Age Group</b>                      |                             |                         |                                   |
| 40-49                                 | Referent                    | Referent                | Referent                          |
| 50-59                                 | 2.20 *** (2.02-2.18)        | 0.98 *** (0.83-1.16)    | 1.01 (0.97-1.06)                  |
| 60-69                                 | 3.02 *** (2.88-3.17)        | 3.42 *** (2.98-3.93)    | 0.99 (0.94-1.04)                  |
| 70-79                                 | 3.74 *** (3.53-3.97)        | 3.82 *** (3.28-4.45)    | 0.55 *** (0.51-0.59)              |
| 80+                                   | 3.98 *** (3.70-4.28)        | 1.64 *** (1.31-2.05)    | 0.39 *** (0.35-0.43)              |
| <b>Fruit and Vegetables</b>           |                             |                         |                                   |
| >5FVeg                                | Referent                    | Referent                | Referent                          |
| <5FVeg                                | 1.52 *** (1.46-1.60)        | 1.61 *** (1.36-1.90)    | 0.99 (0.94-1.04)                  |
| <b>Salt Intake</b>                    |                             |                         |                                   |
| <1 source of salt intake              | Referent                    | Referent                | Referent                          |
| 2 or 3 sources of salt intake         | 0.94 *** (0.91-0.97)        | 1.34 *** (1.21-1.49)    | 1.21 *** (1.17-1.25)              |
| <b>Physical Activity Risk factors</b> |                             |                         |                                   |
| 0 Physical Activity risk factors      | Referent                    | Referent                | Referent                          |
| 1 Physical Activity risk factors      | 1.22 *** (1.18-1.26)        | 0.94 (0.84-1.06)        | 1.12 *** (1.08-1.16)              |
| 2 Physical Activity risk factors      | 1.35 *** (1.27-1.43)        | 1.47 *** (1.26-1.71)    | 1.30 *** (1.22-1.39)              |

330  
331  
332  
333

**Note:** Significance levels are denoted by stars: \*\*\* for  $p \leq 0.01$ , \*\* for  $0.01 < p \leq 0.05$ , and \* for  $0.05 < p \leq 0.10$

## 334 Discussion

335 This study identified significant associations between various behavioural and  
336 physiological risk factors for hypertension, diabetes, and obesity, highlighting important public  
337 health implications for Sierra Leone. The findings underscore the necessity of reducing poor  
338 dietary habits and increasing physical activity to mitigate the onset of these chronic conditions,  
339 which aligns with global and regional health priorities such as Goal 3 of SDGs 2030.

340 Consistent with existing literature, our results underscore the protective role of adequate  
341 fruit and vegetable intake. Participants who consumed fewer than five servings of fruits and  
342 vegetables daily were found to have a higher likelihood of experiencing hypertension, diabetes,

## Diet, Inactivity & CVD Risk Factors in Older Sierra Leoneans (Preprint)

343 and overweight/obesity. This pattern highlights the significant health risks associated with  
344 inadequate fruit and vegetable intake. This finding aligns with prior studies that have  
345 demonstrated the association between higher fruit and vegetable consumption and reduced risk  
346 of CVD, likely due to their high content of dietary fibre, vitamins, and minerals such as  
347 potassium and magnesium<sup>28-32</sup> .

348 Unexpectedly, our study found that higher salt intake was associated with lower odds  
349 of hypertension but higher odds of diabetes and overweight/obesity. This finding contradicts  
350 established research.<sup>33</sup> Further research is needed to explore this relationship in the Sierra  
351 Leonean context. Salt sensitivity is common among people of African descent, which makes it  
352 unlikely that this finding is a causal relationship<sup>34-36</sup>.

353 The association between physical inactivity and increased risk of diabetes and obesity  
354 is well-documented<sup>37-42</sup> . Our study supports these findings, showing that participants with two  
355 physical activity risk factors had higher odds of diabetes and overweight/obesity. This is  
356 consistent with studies conducted in West African populations and underscores the need for  
357 interventions promoting physical activity to reduce the prevalence of these conditions<sup>38 43 44</sup> ..

358 The results also align with Sullivan et al.<sup>45</sup> , who reported that US individuals with two  
359 physical activity risk factors (sedentary for over three hours daily and low weekly physical  
360 activity) had twice the risk of diabetes compared to those with 0-1 physical activity risk factors.  
361 Together, this suggests low weekly physical activity and daily sedentariness may play a  
362 significant role in the onset and establishment of diabetes. Peoples' participation in physical  
363 activity could be influenced by the built and natural environment in which they live and by  
364 personal factors such as gender, age, ability, and motivation. For Sierra Leoneans to be  
365 physically active and reduce sedentary time, physical activity programs and interventions must  
366 be proposed for urban sector-based jobs while raising awareness of the harmful effects of  
367 prolonged sitting.

## Diet, Inactivity & CVD Risk Factors in Older Sierra Leoneans (Preprint)

368 Participants who consumed 2-3 sources of salt intake showed 1.8 times higher risk of  
369 obesity. After adjusting for confounders, such as location, sex and age, the current study found  
370 that 2-3 sources of salt intake were associated with a 21% higher risk of obesity. The findings  
371 agree with the broader literature that suggest high salt intake is associated with obesity<sup>46-49</sup> .  
372 In the case of Sierra Leone, it is likely that the drivers behind higher salt intake and obesity  
373 could be explained by increased consumption of processed calorie-dense foods, which can lead  
374 to excessive sodium intake<sup>46-50</sup> .

375 Our study contributes valuable insights into the epidemiology of CVD risk factors in  
376 sub-Saharan Africa, particularly in Sierra Leone. The findings suggest that urbanization and  
377 associated behaviour changes, such as consumption of processed foods and low physical  
378 activity, are contributing to the rising burden of CVDs in this region. Given the high prevalence  
379 of hypertension, diabetes, and obesity found in this study, targeted public health strategies are  
380 urgently needed to address these risk factors.

381 For Sierra Leone, specific interventions could include public health campaigns to raise  
382 awareness about the benefits of fruit and vegetable consumption and the risks associated with  
383 high salt intake. Policies to promote physical activity, such as creating exercise facilities and  
384 organizing community fitness events, could also be beneficial. Additionally, further research  
385 is needed to explore the complex interplay between behavioural, environmental, and genetic  
386 factors in the development of CVDs in this context.

387

### 388 **Limitations of Current Research**

389 This study has several limitations that must be acknowledged. First, the cross-sectional  
390 design limits our ability to infer causality, as it captures data at a single point in time and  
391 prevents establishing temporal relationships between exposure and outcome. Therefore, while  
392 associations can be identified, causation cannot be definitively determined.

## Diet, Inactivity & CVD Risk Factors in Older Sierra Leoneans (Preprint)

393 Second, reliance on self-reported dietary and physical activity data introduces potential recall  
394 bias and measurement errors. Participants might not accurately remember or report their dietary  
395 intake and physical activity levels, leading to misclassification and potential bias in the  
396 findings. Although efforts were made to minimize these errors, such as using standardized  
397 questionnaires and trained data collectors, the inherent limitations of self-report data remain.  
398 Third, the study was conducted exclusively among Sierra Leonean adults aged 40 years and  
399 above. This age restriction means that the findings may not be generalizable to younger  
400 populations or to other regions with different demographic profiles. The focus on an older  
401 population was driven by the higher prevalence of CVD risk factors in this age group, but future  
402 studies should include a broader age range to enhance generalizability.

403 Additionally, the study did not account for all possible confounding variables. While  
404 key sociodemographic factors were adjusted for, other potential confounders, such as genetic  
405 predispositions, environmental exposures, and access to healthcare, were not included. These  
406 unmeasured confounders might have influenced the observed associations and should be  
407 considered in future research.

408 Finally, despite efforts to ensure accuracy, the possibility of dietary assessment  
409 measurement error by participants exists. Despite these limitations, the study provides  
410 important insights into the behavioural and physiological risk factors for CVDs in Sierra Leone  
411 and highlights areas for future research and public health interventions.

### 412 **Conclusion**

413 In conclusion, this study reveals significant associations between dietary habits,  
414 physical activity levels, and three physiological risk factors for CVD; hypertension, diabetes,  
415 and obesity among adults in Bo District, Sierra Leone. The findings emphasize the critical need  
416 for targeted public health interventions aimed at promoting healthier dietary practices and  
417 increasing physical activity to mitigate the growing burden of CVDs in this region.

## Diet, Inactivity & CVD Risk Factors in Older Sierra Leoneans (Preprint)

418 Addressing these modifiable risk factors through public health campaigns, policy  
419 changes, and community-based interventions could significantly reduce the prevalence of  
420 CVDs and improve overall population health. Additionally, the study highlights the importance  
421 of further research to explore the complex interplay between behavioural, environmental, and  
422 genetic factors in the development of CVDs.

423 By understanding and addressing the specific risk factors prevalent in Sierra Leone,  
424 effective strategies can be developed to combat CVDs and contribute to the global efforts to  
425 reduce the burden of non-communicable diseases. These efforts are crucial not only for  
426 improving health outcomes but also for achieving sustainable development goals related to  
427 health and well-being in low- and middle-income countries.

428

429

### 430 References

- 431 1. Chand SS, Singh B, Kumar S. The economic burden of non-communicable disease mortality  
432 in the South Pacific: Evidence from Fiji. *PLOS ONE* 2020;15(7):e0236068. doi:  
433 10.1371/journal.pone.0236068
- 434 2. Gowshall M, Taylor-Robinson SD. The increasing prevalence of non-communicable  
435 diseases in low-middle income countries: the view from Malawi. *International Journal*  
436 *of General Medicine* 2018;11(null):255-64. doi: 10.2147/IJGM.S157987
- 437 3. UN. United Nations-Department of Economic and Social Affairs- Sustainable Development  
438 Goal 3: Ensure healthy lives and promote well-being for all at all ages 2015 [cited 2025  
439 5 September]. Available from: <https://sdgs.un.org/goals/goal32024>
- 440 4. Vos T, Lim SS, Abbafati C, et al. Global burden of 369 diseases and injuries in 204 countries  
441 and territories, 1990&#x2013;2019: a systematic analysis for the Global Burden of

Diet, Inactivity & CVD Risk Factors in Older Sierra Leoneans (Preprint)

- 442 Disease Study 2019. *The Lancet* 2020;396(10258):1204-22. doi: 10.1016/S0140-  
443 6736(20)30925-9
- 444 5. Amini M, Zayeri F, Salehi M. Trend analysis of cardiovascular disease mortality, incidence,  
445 and mortality-to-incidence ratio: results from global burden of disease study 2017.  
446 *BMC Public Health* 2021;21(1):401. doi: 10.1186/s12889-021-10429-0
- 447 6. Roth GA, Mensah GA, Johnson CO, et al. Global Burden of Cardiovascular Diseases and  
448 Risk Factors, 1990–2019: Update From the GBD 2019 Study. *Journal of the American*  
449 *College of Cardiology* 2020;76(25):2982-3021. doi:  
450 <https://doi.org/10.1016/j.jacc.2020.11.010>
- 451 7. McKenzie BL, Santos JA, Geldsetzer P, et al. Evaluation of sex differences in dietary  
452 behaviours and their relationship with cardiovascular risk factors: a cross-sectional  
453 study of nationally representative surveys in seven low- and middle-income countries.  
454 *Nutrition Journal* 2020;19(1):3. doi: 10.1186/s12937-019-0517-4
- 455 8. Rosengren A, Smyth A, Rangarajan S, et al. Socioeconomic status and risk of cardiovascular  
456 disease in 20 low-income, middle-income, and high-income countries: the Prospective  
457 Urban Rural Epidemiologic (PURE) study. *The Lancet Global Health* 2019;7(6):e748-  
458 e60. doi: 10.1016/S2214-109X(19)30045-2
- 459 9. Yusuf S, Joseph P, Rangarajan S, et al. Modifiable risk factors, cardiovascular disease, and  
460 mortality in 155&#x2008;722 individuals from 21 high-income, middle-income, and  
461 low-income countries (PURE): a prospective cohort study. *The Lancet*  
462 2020;395(10226):795-808. doi: 10.1016/S0140-6736(19)32008-2
- 463 10. de Oliveira Otto MC, Afshin A, Micha R, et al. The Impact of Dietary and Metabolic Risk  
464 Factors on Cardiovascular Diseases and Type 2 Diabetes Mortality in Brazil. *PLOS*  
465 *ONE* 2016;11(3):e0151503. doi: 10.1371/journal.pone.0151503



Diet, Inactivity & CVD Risk Factors in Older Sierra Leoneans (Preprint)

- 466 11. WHO. World Health Organization Noncommunicable Disease Surveillance, Monitoring  
467 and Reporting - STEPS surveillance manual. STEPs manual. 2017 [updated 26 January  
468 2017. Available from: [https://www.who.int/teams/noncommunicable-](https://www.who.int/teams/noncommunicable-diseases/surveillance/systems-tools/steps/manuals)  
469 [diseases/surveillance/systems-tools/steps/manuals](https://www.who.int/teams/noncommunicable-diseases/surveillance/systems-tools/steps/manuals) accessed September 2024.
- 470 12. Gafane-Matemane LF, Craig A, Kruger R, et al. Hypertension in sub-Saharan Africa: the  
471 current profile, recent advances, gaps, and priorities. *Journal of Human Hypertension*  
472 2024 doi: 10.1038/s41371-024-00913-6
- 473 13. Green R, Cornelsen L, Dangour AD, et al. The effect of rising food prices on food  
474 consumption: systematic review with meta-regression. *BMJ : British Medical Journal*  
475 2013;346:f3703. doi: 10.1136/bmj.f3703
- 476 14. Popkin BM, Adair LS, Ng SW. Global nutrition transition and the pandemic of obesity in  
477 developing countries. *Nutrition Reviews* 2012;70(1):3-21. doi: 10.1111/j.1753-  
478 4887.2011.00456.x
- 479 15. Smart JC, Tschirley D, Smart F. Diet Quality and Urbanization in Mozambique. *Food and*  
480 *Nutrition Bulletin* 2020;41(3):298-317. doi: 10.1177/0379572120930123
- 481 16. Steyn N. Dietary changes and the health transition in South Africa: implications for health  
482 policy NP Steyn, D. Bradshaw, R. Norman, JD Joubert, M. Schneider and K. Steyn.  
483 *The double burden of malnutrition: Case Studies from six developing countries*  
484 2006;84:259.
- 485 17. Dehghan M, Mente A, Zhang X, et al. Associations of fats and carbohydrate intake with  
486 cardiovascular disease and mortality in 18 countries from five continents (PURE): a  
487 prospective cohort study. *The Lancet* 2017;390(10107):2050-62. doi: 10.1016/S0140-  
488 6736(17)32252-3
- 489 18. Jones-Smith JC, Gordon-Larsen P, Siddiqi A, et al. Is the burden of overweight shifting to  
490 the poor across the globe? Time trends among women in 39 low- and middle-income

Diet, Inactivity & CVD Risk Factors in Older Sierra Leoneans (Preprint)

- 491 countries (1991–2008). *International Journal of Obesity* 2012;36(8):1114-20. doi:  
492 10.1038/ijo.2011.179
- 493 19. Muthuri SK, Francis CE, Wachira L-JM, et al. Evidence of an Overweight/Obesity  
494 Transition among School-Aged Children and Youth in Sub-Saharan Africa: A  
495 Systematic Review. *PLOS ONE* 2014;9(3):e92846. doi: 10.1371/journal.pone.0092846
- 496 20. Oyebo O, Oti S, Chen Y-F, et al. Salt intakes in sub-Saharan Africa: a systematic review  
497 and meta-regression. *Population Health Metrics* 2016;14(1):1. doi: 10.1186/s12963-  
498 015-0068-7
- 499 21. Ziraba AK, Fotso JC, Ochako R. Overweight and obesity in urban Africa: A problem of  
500 the rich or the poor? *BMC Public Health* 2009;9(1):465. doi: 10.1186/1471-2458-9-465
- 501 22. Mensah DO, Nunes AR, Bockarie T, et al. Meat, fruit, and vegetable consumption in sub-  
502 Saharan Africa: a systematic review and meta-regression analysis. *Nutrition Reviews*  
503 2020;79(6):651-92. doi: 10.1093/nutrit/nuaa032
- 504 23. Addo J, Smeeth L, Leon DA. Hypertension In Sub-Saharan Africa. *Hypertension*  
505 2007;50(6):1012-18. doi: 10.1161/HYPERTENSIONAHA.107.093336
- 506 24. Ataklte F, Erqou S, Kaptoge S, et al. Burden of Undiagnosed Hypertension in Sub-Saharan  
507 Africa. *Hypertension* 2015;65(2):291-98. doi:  
508 10.1161/HYPERTENSIONAHA.114.04394
- 509 25. Atibila F, Hoor Gt, Donkoh ET, et al. Prevalence of hypertension in Ghanaian society: a  
510 systematic review, meta-analysis, and GRADE assessment. *Systematic Reviews*  
511 2021;10(1):220. doi: 10.1186/s13643-021-01770-x
- 512 26. Bosu WK, Bosu DK. Prevalence, awareness and control of hypertension in Ghana: A  
513 systematic review and meta-analysis. *PLOS ONE* 2021;16(3):e0248137. doi:  
514 10.1371/journal.pone.0248137

Diet, Inactivity & CVD Risk Factors in Older Sierra Leoneans (Preprint)

- 515 27. Stats SL. Sierra Leone population and housing census 2015; Statistics Sierra Leone; 2015  
516 [cited 2024. Available from: <https://www.statistics.sl/index.php/census/census->  
517 [2015.html](https://www.statistics.sl/index.php/census/census-2015.html) accessed 17 February 2024.
- 518 28. Aune D, Giovannucci E, Boffetta P, et al. Fruit and vegetable intake and the risk of  
519 cardiovascular disease, total cancer and all-cause mortality—a systematic review and  
520 dose-response meta-analysis of prospective studies. *International Journal of*  
521 *Epidemiology* 2017;46(3):1029-56. doi: 10.1093/ije/dyw319
- 522 29. Oyebode O, Gordon-Dseagu V, Walker A, et al. Fruit and vegetable consumption and all-  
523 cause, cancer and CVD mortality: analysis of Health Survey for England data. *Journal*  
524 *of Epidemiology and Community Health* 2014;68(9):856. doi: 10.1136/jech-2013-  
525 203500
- 526 30. Wallace TC, Bailey RL, Blumberg JB, et al. Fruits, vegetables, and health: A  
527 comprehensive narrative, umbrella review of the science and recommendations for  
528 enhanced public policy to improve intake. *Critical Reviews in Food Science and*  
529 *Nutrition* 2020;60(13):2174-211. doi: 10.1080/10408398.2019.1632258
- 530 31. Zhan J, Liu Y-J, Cai L-B, et al. Fruit and vegetable consumption and risk of cardiovascular  
531 disease: A meta-analysis of prospective cohort studies. *Critical Reviews in Food*  
532 *Science and Nutrition* 2017;57(8):1650-63. doi: 10.1080/10408398.2015.1008980
- 533 32. Zurbau A, Au-Yeung F, Blanco Mejia S, et al. Relation of Different Fruit and Vegetable  
534 Sources With Incident Cardiovascular Outcomes: A Systematic Review and Meta-  
535 Analysis of Prospective Cohort Studies. *Journal of the American Heart Association*  
536 2020;9(19):e017728. doi: 10.1161/JAHA.120.017728
- 537 33. Islam SMS, Mainuddin A, Islam MS, et al. Prevalence of risk factors for hypertension: A  
538 cross-sectional study in an urban area of Bangladesh. *Global Cardiology Science and*  
539 *Practice* 2015;2015(4) doi: <https://doi.org/10.5339/gcsp.2015.43>

Diet, Inactivity & CVD Risk Factors in Older Sierra Leoneans (Preprint)

- 540 34. Aburto NJ, Ziolkovska A, Hooper L, et al. Effect of lower sodium intake on health:  
541 systematic review and meta-analyses. *Bmj* 2013;346:f1326.
- 542 35. Appel LJ, Moore TJ, Obarzanek E, et al. A Clinical Trial of the Effects of Dietary Patterns  
543 on Blood Pressure. *New England Journal of Medicine* 1997;336(16):1117-24. doi:  
544 doi:10.1056/NEJM199704173361601
- 545 36. He FJ, Li J, MacGregor GA. Effect of longer term modest salt reduction on blood pressure:  
546 Cochrane systematic review and meta-analysis of randomised trials. *BMJ : British*  
547 *Medical Journal* 2013;346:f1325. doi: 10.1136/bmj.f1325
- 548 37. Aune D, Norat T, Leitzmann M, et al. Physical activity and the risk of type 2 diabetes: a  
549 systematic review and dose–response meta-analysis. *European Journal of*  
550 *Epidemiology* 2015;30(7):529-42. doi: 10.1007/s10654-015-0056-z
- 551 38. Cleven L, Krell-Roesch J, Nigg CR, et al. The association between physical activity with  
552 incident obesity, coronary heart disease, diabetes and hypertension in adults: a  
553 systematic review of longitudinal studies published after 2012. *BMC Public Health*  
554 2020;20(1):726. doi: 10.1186/s12889-020-08715-4
- 555 39. Jakicic JM, Kraus WE, Powell KE, et al. Association between Bout Duration of Physical  
556 Activity and Health: Systematic Review. *Med Sci Sports Exerc* 2019;51(6):1213-19.  
557 doi: 10.1249/mss.0000000000001933
- 558 40. Jeon CY, Lokken RP, Hu FB, et al. Physical Activity of Moderate Intensity and Risk of  
559 Type 2 Diabetes: A systematic review. *Diabetes Care* 2007;30(3):744-52. doi:  
560 10.2337/dc06-1842
- 561 41. Rauner A, Mess F, Woll A. The relationship between physical activity, physical fitness and  
562 overweight in adolescents: a systematic review of studies published in or after 2000.  
563 *BMC Pediatrics* 2013;13(1):19. doi: 10.1186/1471-2431-13-19

Diet, Inactivity & CVD Risk Factors in Older Sierra Leoneans (Preprint)

- 564 42. Smith AD, Crippa A, Woodcock J, et al. Physical activity and incident type 2 diabetes  
565 mellitus: a systematic review and dose–response meta-analysis of prospective cohort  
566 studies. *Diabetologia* 2016;59(12):2527-45. doi: 10.1007/s00125-016-4079-0
- 567 43. Huang Z, Zhuang X, Huang R, et al. Physical Activity and Weight Loss Among Adults  
568 With Type 2 Diabetes and Overweight or Obesity: A Post Hoc Analysis of the Look  
569 AHEAD Trial. *JAMA Network Open* 2024;7(2):e240219-e19. doi:  
570 10.1001/jamanetworkopen.2024.0219
- 571 44. Lee IM, Shiroma EJ, Lobelo F, et al. Effect of physical inactivity on major non-  
572 communicable diseases worldwide: an analysis of burden of disease and life  
573 expectancy. *The Lancet* 2012;380(9838):219-29. doi: 10.1016/S0140-6736(12)61031-  
574 9
- 575 45. Sullivan PW, Morrato EH, Ghushchyan V, et al. Obesity, Inactivity, and the Prevalence of  
576 Diabetes and Diabetes-Related Cardiovascular Comorbidities in the U.S., 2000–2002.  
577 *Diabetes Care* 2005;28(7):1599-603. doi: 10.2337/diacare.28.7.1599
- 578 46. Grimes CA, Bolhuis DP, He FJ, et al. Dietary sodium intake and overweight and obesity  
579 in children and adults: a protocol for a systematic review and meta-analysis. *Syst Rev*  
580 2016;5:7. doi: 10.1186/s13643-015-0175-3 [published Online First: 20160118]
- 581 47. Lee J, Sohn C, Kim OY, et al. The association between dietary sodium intake and obesity  
582 in adults by sodium intake assessment methods: a review of systematic reviews and re-  
583 meta-analysis. *Nutr Res Pract* 2023;17(2):175-91. doi: 10.4162/nrp.2023.17.2.175  
584 [published Online First: 20230120]
- 585 48. Ma Y, He FJ, MacGregor GA. High Salt Intake. *Hypertension* 2015;66(4):843-49. doi:  
586 10.1161/HYPERTENSIONAHA.115.05948

## Diet, Inactivity & CVD Risk Factors in Older Sierra Leoneans (Preprint)

587 49. Moosavian SP, Haghghatdoost F, Surkan PJ, et al. Salt and obesity: a systematic review  
588 and meta-analysis of observational studies. *International Journal of Food Sciences and*  
589 *Nutrition* 2017;68(3):265-77. doi: 10.1080/09637486.2016.1239700

590 50. MoH, MAFFS. Ministry of Health and Sanitation (MOHS) - SIERRA LEONE FOOD  
591 BASED DIETARY GUIDELINE FOR HEALTHY EATING (2016). Food and  
592 Agriculture Organization of the United Nations (FAO): Ministry of Agriculture,  
593 Forestry and Food Security (MAFFS)-Sierra Leone, 2016.

594

595

596 Appendix

### 597 **Prevalence of CVD Risk Factors by individual Behavioural factors**

598 Participants who consumed fewer than five servings of fruits and vegetables daily  
599 exhibited higher prevalence of hypertension (85.8% vs. 14.2%), diabetes (89% vs. 10.4%), and  
600 overweight/obesity (84.7% vs. 15.3%) compared with those who met the recommended intake  
601 of five servings per day (Table 1).

602 In contrast, participants with higher salt intake, defined as consuming salt from two or  
603 three sources, demonstrated a lower prevalence of hypertension (46.1% vs. 53.9%) and  
604 overweight/obesity (47.1% vs. 52.9%) but a higher prevalence of diabetes (51.1% vs. 42.9%)  
605 compared with those with lower salt intake.

606 Physical activity also had a significant association with the prevalence of physiological  
607 CVD risk factors. Individuals with at least one physical activity risk factor (e.g., inadequate  
608 moderate and vigorous physical activity (MVPA) or high levels of physical inactivity) showed  
609 higher prevalence rates of hypertension (42.0% vs. 40.5%), diabetes (40.8% vs. 38.9%), and

Diet, Inactivity & CVD Risk Factors in Older Sierra Leoneans (Preprint)

610 overweight/obesity (44.4% vs. 41.8%) compared with those with no physical activity risk  
611 factors (Table 1).

612  
613 *Table 1 : Descriptive Analysis of Behavioural Risk Factors and CVD Physiological Risk Factors*

| Risk factors                          | No n(%)      | HTN HTN n(%) | No DM n(%)   | DM n(%)     | Normal weight n(%) | Overweight/Obese n(%) |
|---------------------------------------|--------------|--------------|--------------|-------------|--------------------|-----------------------|
| <b>Fruit and Vegetables</b>           |              |              |              |             |                    |                       |
| >5FVeg                                | 6762 (19.1)  | 4409 (14.2)  | 10494 (16.6) | 165 (10.4)  | 7590 (16.7)        | 2786 (15.3)           |
| <5FVeg                                | 28557 (80.9) | 26708 (85.8) | 52615 (83.4) | 1423 (89.6) | 37828 (83.3)       | 15469 (84.7)          |
| <b>Salt Intake</b>                    |              |              |              |             |                    |                       |
| <1 source of salt intake              | 28030 (56.3) | 25264 (53.9) | 51638 (56.1) | 1096 (42.9) | 37530 (55.8)       | 13742 (52.9)          |
| 2 or 3 sources of salt intake         | 21762 (43.7) | 21598 (46.1) | 40401 (53.4) | 1461 (57.1) | 29705 (44.2)       | 12256 (47.1)          |
| <b>Physical Activity Risk Factors</b> |              |              |              |             |                    |                       |
| 0 Physical Activity risk factors      | 25560 (51.3) | 19010 (40.5) | 42907 (46.6) | 1011 (38.9) | 32666 (48.6)       | 10866 (41.8)          |
| 1 Physical Activity risk factors      | 20081 (40.3) | 19681 (42.0) | 37562 (40.8) | 1060 (40.8) | 27238 (40.5)       | 11555 (44.4)          |
| 2 Physical Activity risk factors      | 4151 (8.3)   | 8213 (17.5)  | 11571 (12.6) | 528 (20.3)  | 7330 (10.9)        | 3578 (13.8)           |

614  
615 Sociodemographic characteristics were associated with the prevalence of physiological  
616 CVD risk factors. Rural residents had a higher prevalence of diabetes and overweight/obesity  
617 but a lower prevalence of hypertension compared with urban residents (Table 5). This variation  
618 may reflect differences in behaviour and access to healthcare services between rural and urban  
619 areas.

620 Sex differences were also apparent, with males exhibiting lower prevalence rates of  
621 hypertension (46.2% vs. 53.8%), diabetes (45.9% vs. 54.1%), and overweight/obesity (33.3%  
622 vs. 66.7%) compared with females. Age-wise, individuals aged 40-49 years had higher  
623 prevalence rates of hypertension (32.4%), diabetes (31.1%), and overweight/obesity (47.9%)  
624 compared to older age groups (Table 2). This suggests that middle-aged adults in this cohort  
625 may be at greater risk and highlights the need for targeted interventions.

626

Diet, Inactivity & CVD Risk Factors in Older Sierra Leoneans (Preprint)

627

628 *Table 2 : Descriptive Analysis of Sociodemographic Characteristics by Hypertension, Diabetes, and Weight Status*

|                  | No HTN<br>n(%)  | HTN<br>n(%)     | No DM<br>n(%)   | DM<br>n(%)     | Normal weight<br>n(%) | Overweight/Obese<br>n(%) |
|------------------|-----------------|-----------------|-----------------|----------------|-----------------------|--------------------------|
| <b>Location</b>  |                 |                 |                 |                |                       |                          |
| Rural            | 33526<br>(67.3) | 27045<br>(57.7) | 57713<br>(62.7) | 1214<br>(46.7) | 45916 (68.3)          | 12881 (49.5)             |
| Urban            | 16266<br>(32.7) | 19858<br>(42.3) | 34327<br>(32.3) | 1384<br>(53.3) | 21319 (31.7)          | 13117 (50.5)             |
| <b>Sex</b>       |                 |                 |                 |                |                       |                          |
| Female           | 22432<br>(45.1) | 25242<br>(53.8) | 45346<br>(49.3) | 1406<br>(54.1) | 28470 (42.3)          | 17336 (66.7)             |
| Male             | 27361<br>(54.9) | 21661<br>(46.2) | 46693<br>(50.7) | 1192<br>(45.9) | 38765 (57.7)          | 8663 (33.3)              |
| <b>Age Group</b> |                 |                 |                 |                |                       |                          |
| 40-49            | 27799<br>(55.8) | 15185<br>(32.4) | 41187<br>(44.7) | 807<br>(31.1)  | 29368 (43.7)          | 12461 (47.9)             |
| 50-59            | 11711<br>(23.5) | 12578<br>(26.8) | 23237<br>(25.2) | 578<br>(22.3)  | 17084 (25.4)          | 6564 (25.2)              |
| 60-69            | 5583<br>(11.2)  | 8761<br>(18.7)  | 13413<br>(14.6) | 671<br>(25.8)  | 9912 (14.7)           | 4009 (15.4)              |
| 70-79            | 2802 (5.6)      | 6112<br>(13.0)  | 8349 (9.1)      | 425<br>(16.4)  | 6495 (9.7)            | 2000 (7.7)               |
| 80+              | 1899 (3.8)      | 4268 (9.1)      | 5854 (6.4)      | 116 (4.5)      | 4377 (6.5)            | 965 (3.7)                |

629

630

631 **Association Between Behavioural Risk Factors, Sociodemographic Characteristics, and**

632 **Physiological Risk Factors for CVD**

633 The results from the unadjusted regression analysis reveal that individuals consuming fewer  
 634 than five servings of fruits and vegetables daily had significantly higher odds of hypertension  
 635 (OR=1.62, 95% CI [1.56-1.69], p<0.001), diabetes (OR=1.82, 95% CI [1.54-2.15], p<0.001),  
 636 and overweight/obesity (OR=1.17, 95% CI [1.12-1.23], p<0.001) compared with those meeting  
 637 the recommended intake (Table 3).

638 In terms of salt intake, participants consuming salt from two or three sources had higher odds  
 639 of diabetes (OR=1.36, 95% CI [1.23-1.51], p<0.001) and overweight/obesity (OR=1.18, 95%  
 640 CI [1.14-1.22], p<0.001), but lower odds of hypertension (OR=0.94, 95% CI [0.91-0.97],  
 641 p<0.001) compared with those with lower salt intake. For physical activity, individuals with



Diet, Inactivity & CVD Risk Factors in Older Sierra Leoneans (Preprint)

642 two physical activity risk factors had significantly higher odds of hypertension (OR=2.40, 95%  
 643 CI [2.27-2.52],  $p < 0.001$ ), diabetes (OR=2.31, 95% CI [2.01-2.65],  $p < 0.001$ ), and  
 644 overweight/obesity (OR=1.26, 95% CI [1.19-1.34],  $p < 0.001$ ) compared with those with no  
 645 physical activity risk factors (Table 3).

646  
 647  
 648  
 649

Table 3: Unadjusted Logistic Regression Models for Behavioural Risk Factors and Cardiovascular Conditions

| Risk Factors                          | Hypertension<br>OR<br>(95% CI) | Diabetes<br>OR<br>(95% CI) | Overweight/Obesity<br>OR<br>(95% CI) |
|---------------------------------------|--------------------------------|----------------------------|--------------------------------------|
| <b>Fruit and Vegetables</b>           |                                |                            |                                      |
| >5FVeg                                | Referent                       | Referent                   | Referent                             |
| <5FVeg                                | 1.62*** (1.56-1.69)            | 1.82*** (1.54-2.15)        | 1.17*** (1.12-1.23)                  |
| <b>Salt Intake</b>                    |                                |                            |                                      |
| <1 source of salt intake              | Referent                       | Referent                   | Referent                             |
| 2 or 3 sources of salt intake         | 0.94*** (0.91-0.97)            | 1.36*** (1.23-1.51)        | 1.18*** (1.14-1.22)                  |
| <b>Physical Activity Risk factors</b> |                                |                            |                                      |
| 0 Physical Activity risk factors      | Referent                       | Referent                   | Referent                             |
| 1 Physical Activity risk factors      | 1.40*** (1.35-1.45)            | 1.20*** (1.07-1.35)        | 1.22*** (1.17-1.26)                  |
| 2 Physical Activity risk factors      | 2.40*** (2.27-2.52)            | 2.31*** (2.01-2.65)        | 1.26*** (1.19-1.34)                  |

650 **Note:** Significance levels are denoted by stars: \*\*\* for  $p \leq 0.01$ , \*\* for  $0.01 < p \leq 0.05$ ,  
 651 and \* for  $0.05 < p \leq 0.10$

652
